# Supplementary material for: Action potential broadening in a presynaptic channelopathy
Source: PubMed Central journal article supplement (PMC4935806; doi:10.1038/ncomms12102), 2016-07-06
Supplement: ncomms12102-s1.pdf [file ncomms12102-s1.pdf]

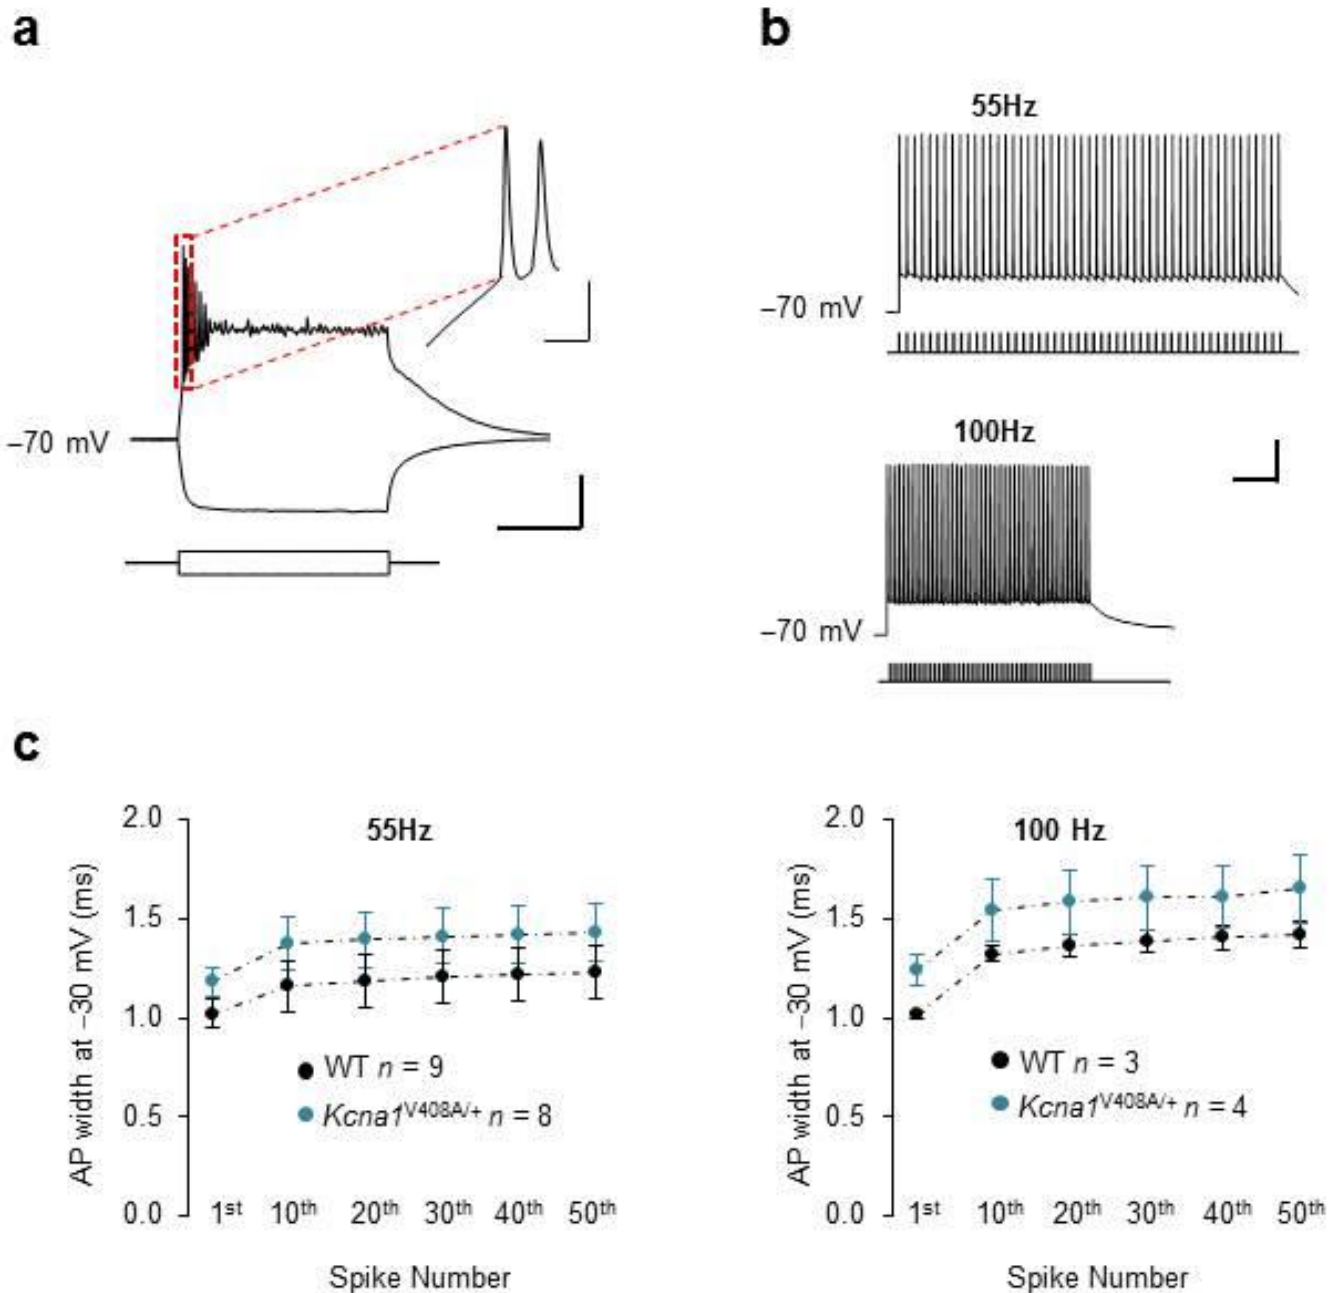

**Supplementary Fig. 1: Properties of basket cell terminals.**

(a) Prolonged depolarizing currents failed to elicit repetitive firing. Representative traces from one bouton in response to 500 ms depolarizing and hyperpolarizing 40 pA current pulses. Scale: 20 mV, 200 ms (main traces), 20 mV, 5 ms (insets). (b) Action potentials evoked by 55 Hz and 100 Hz trains of 1 ms depolarizing pulses, scale: 20 mV, 100 ms. (c) Action potential broadening at 55 Hz or 100 Hz in wild type and *Kcna1<sup>V408A/+</sup>* mice.

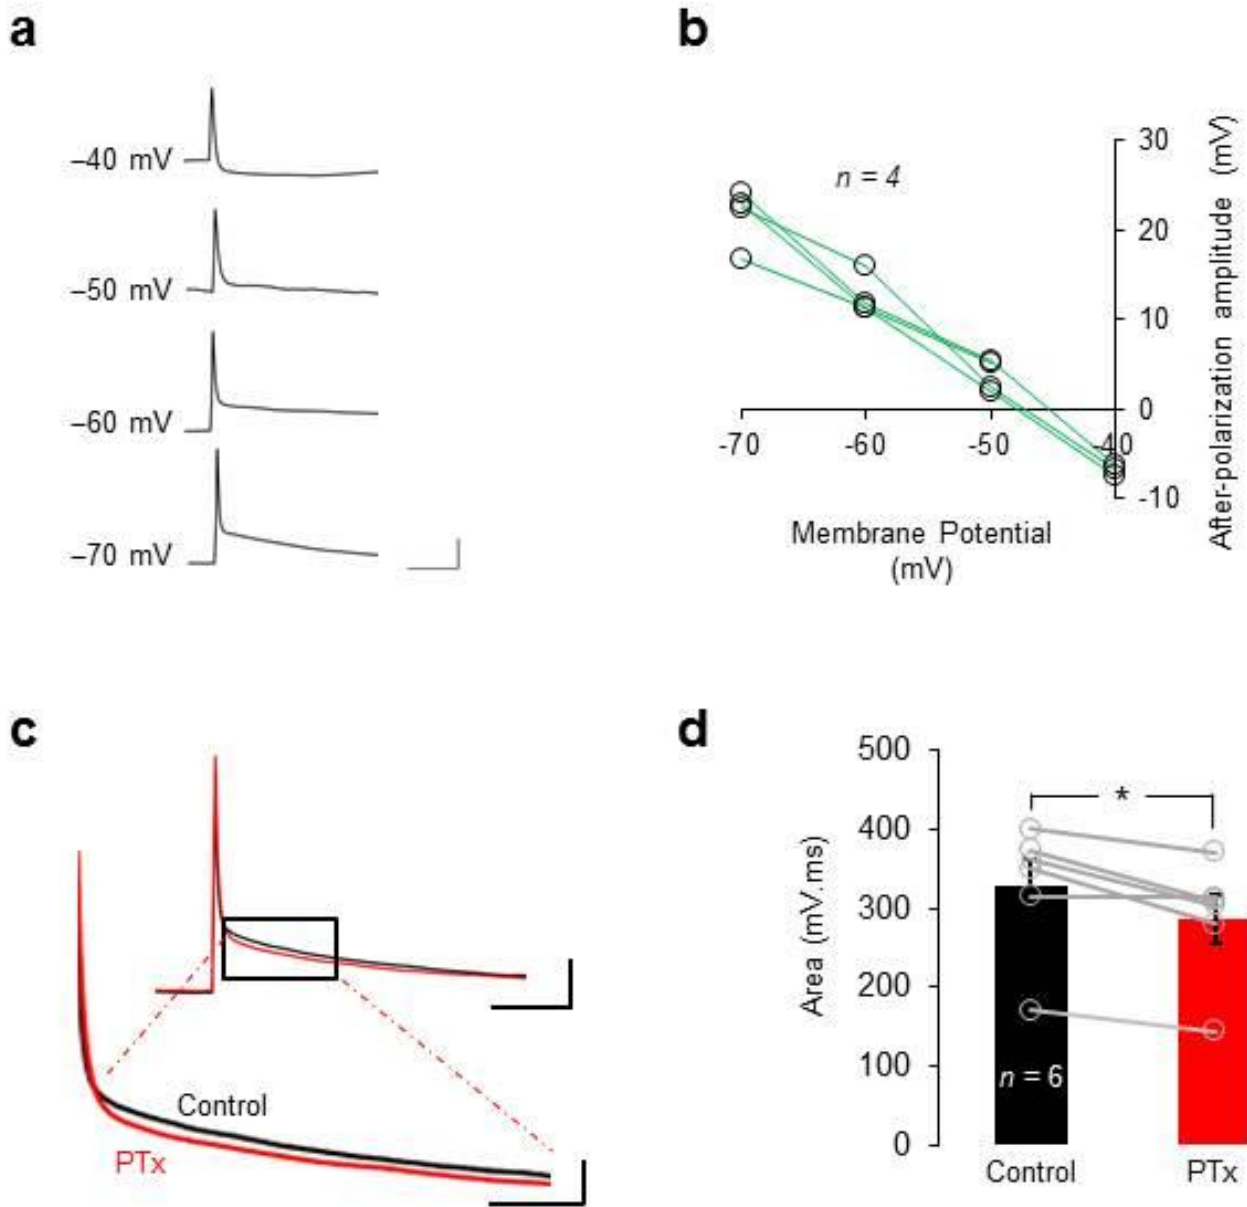

### Supplementary Fig. 2. Bouton ADP properties.

(a) Representative traces from one bouton showing reversal of the ADP around  $-48$  mV. Scale: 20 mV, 20 ms. (b) Summary data. (c) Representative traces from one bouton showing the effect of GABA<sub>A</sub> receptor blockade with picROTOXIN (PTx). Scale: 20 mV, 20 ms (main traces); 5 mV, 5 ms (expanded trace). (d) PTx only decreased the ADP area measured over the initial 20 ms by a small amount (baseline:  $329 \pm 34$  mV.ms; PTx:  $287 \pm 31$  mV.ms). \*  $p < 0.05$ , paired  $t$  test,  $n = 6$ .

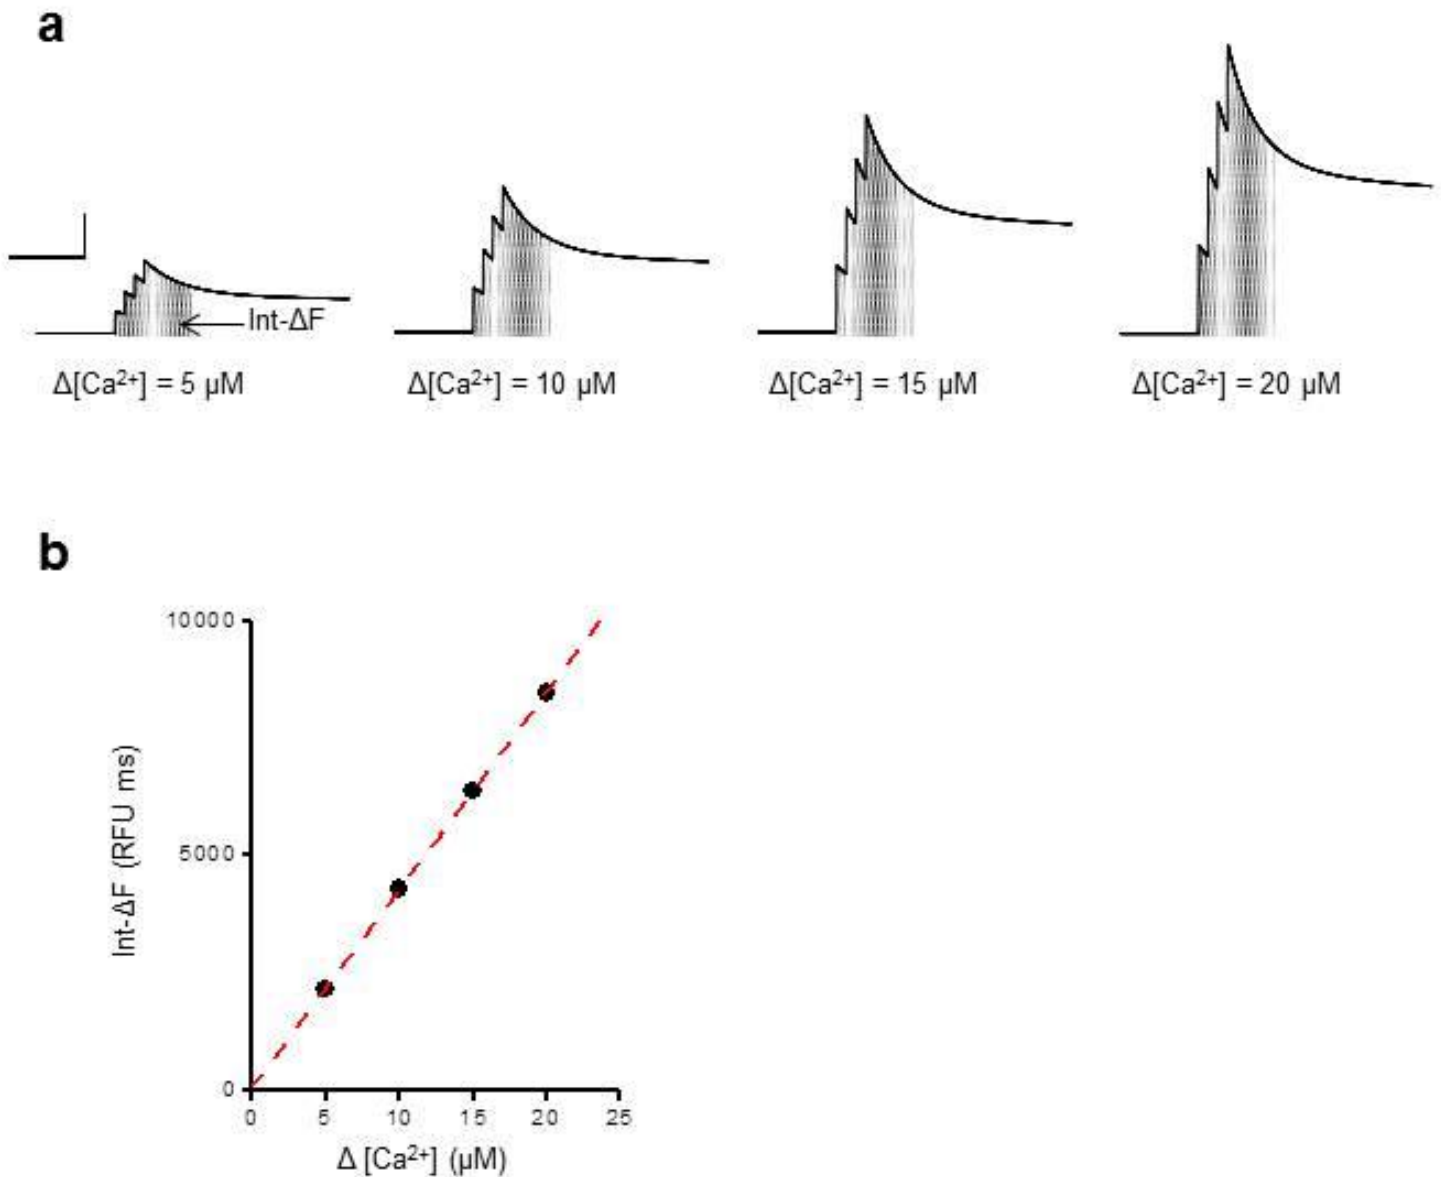

**Supplementary Fig. 3. Fluo-4 fluorescence integrated over 200 ms (Int- $\Delta F$ ) is proportional to total action potential-evoked  $\Delta[\text{Ca}^{2+}]$ .**

(a) Fluo-4  $\text{Ca}^{2+}$  fluorescence responses to a 40 Hz burst of 4 action potentials, simulated using a non-stationary single compartment model of presynaptic  $\text{Ca}^{2+}$  dynamics for different values of  $\Delta[\text{Ca}^{2+}]$  per action potential. Shaded area under the traces corresponds to the integral of Fluo-4 fluorescence over 200 ms, starting with the beginning of stimulation (Int- $\Delta F$ ). This was used as a measure of action potential-evoked  $\Delta[\text{Ca}^{2+}]$ . Scale: 10 RFU, 200 ms. (b) Linear relationship between Int- $\Delta F$  and  $\Delta[\text{Ca}^{2+}]$ .

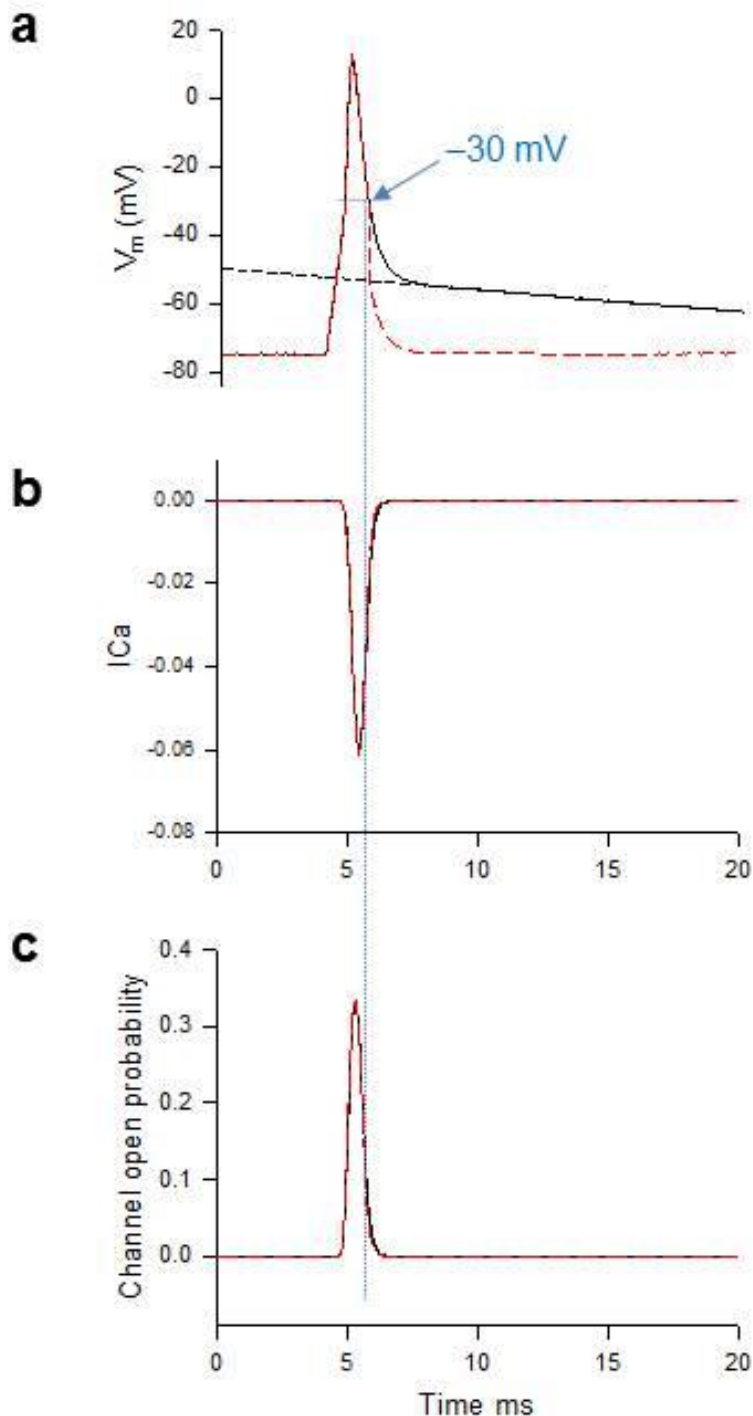

**Supplementary Fig. 4. The ADP has a small effect on  $Ca^{2+}$  entry.**

(a) The ADP was modelled by fitting a straight line to the slow voltage relaxation following a representative presynaptic action potential (dashed black line). It was then subtracted from the action potential waveform, starting when the membrane potential passed the -30 mV point (dashed red line). (b) Simulated  $Ca^{2+}$  current using six-state model (black: control; dashed red: without ADP). (c) Estimated open probability. Subtracting the ADP decreased the total integrated  $Ca^{2+}$  current by ~3%.

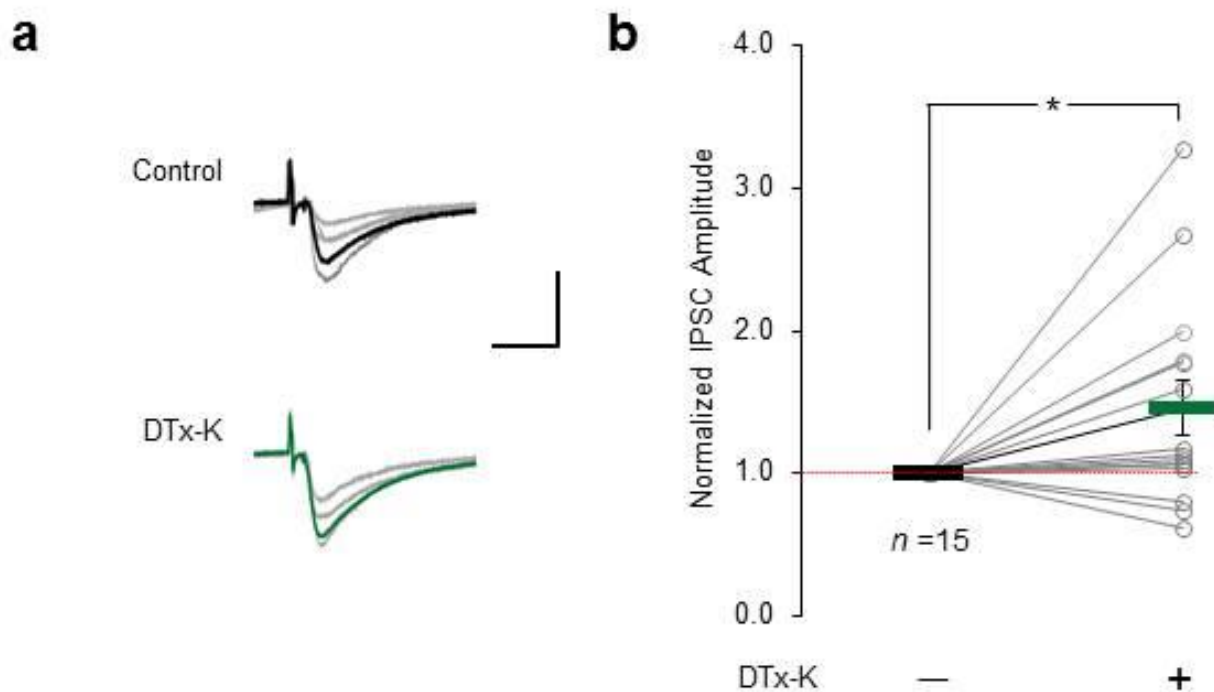

**Supplementary Fig. 5. Effect of DTx-K on IPSCs recorded in wild type cerebellar Purkinje cells.**

(a) Representative data from one experiment. Grey traces are individual sweeps; black and green traces are averages. Scale: 200 pA, 5 ms. (b) Summary of data. \*  $p < 0.05$ , paired  $t$  test.

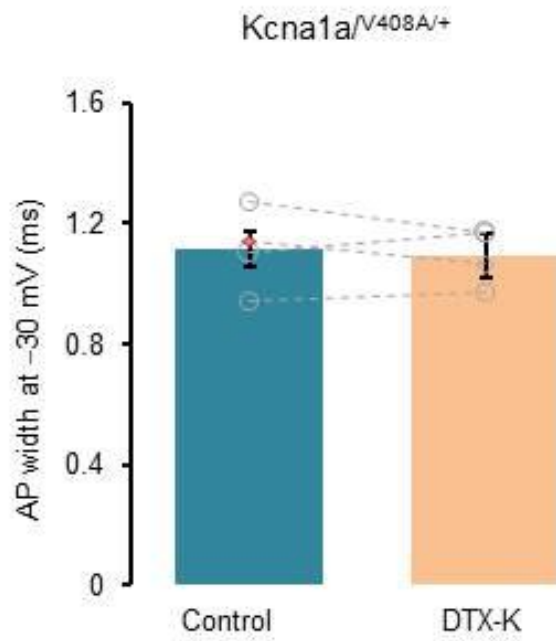

**Supplementary Fig. 6. No effect of DTx-K on presynaptic spike width in *Kcna1*<sup>V408A/+</sup> mice.**

Summary of spike widths before and after DTx-K.

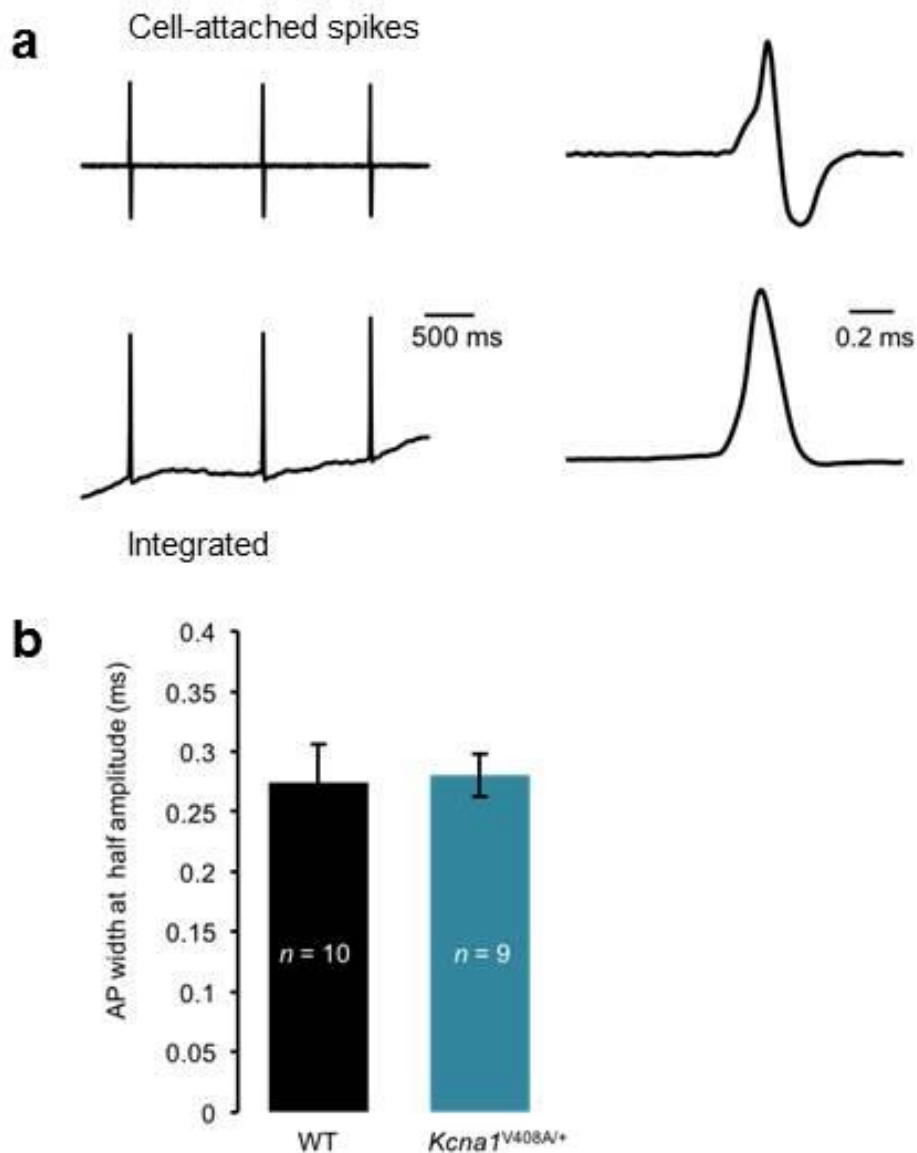

**Supplementary Fig. 7. No difference in Purkinje cell spike width in *Kcna1*<sup>V408A/+</sup> mice.**

(a) Sample trace from one experiment showing cell-attached recording (top) and after numerical integration to estimate the spike width (bottom). Right: expanded time-base. (b) Comparison of wild type and *Kcna1*<sup>V408A/A</sup> neurons. Between 15 and 61 spikes were measured in each Purkinje cell.

**Supplementary Table 1: Passive membrane properties and action potential threshold.**

|                  | <b>WT</b>                        | <b><i>Kcna1</i><sup>V408A/+</sup></b> |
|------------------|----------------------------------|---------------------------------------|
| RMP              | $-68.8 \pm 1.5$ mV (n = 9)       | $-68.6 \pm 2.3$ mV (n = 10)           |
| Spike threshold  | $-43.2 \pm 1.1$ (n = 13)         | $-41.0 \pm 0.9$ (n = 21)              |
| Rheobase         | $15.7 \pm 1.2$ pA (n = 7)        | $10.8 \pm 4.7$ pA (n = 6)             |
| Input resistance | $1.1 \pm 0.2$ G $\Omega$ (n = 8) | $1.4 \pm 0.2$ G $\Omega$ (n = 9)      |
| $\tau$           | $11.8 \pm 1.4$ ms (n = 7)        | $12.2 \pm 1.0$ ms (n = 9)             |
